# Supplementary material
Source: PubMed Central journal article supplement (PMC4135834)
Supplement: AAC.02859-14_zac009143200so1.pdf [file AAC.02859-14_zac009143200so1.pdf]

## Supplementary Figure 1

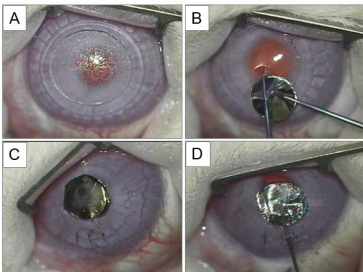

Supplementary Figure 1. The surgical procedure of rabbit cornea (A) stroma pocket creation, (B) Ti film implantation, (C) incision closure and (D) bacteria inoculation.

## Supplementary Figure 2

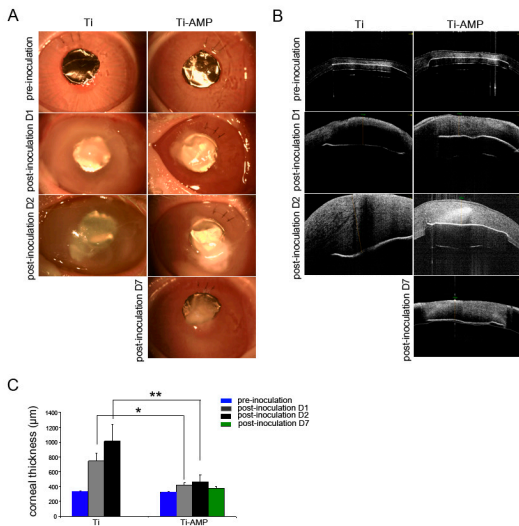

Supplementary Figure 2. In vivo bactericidal effect of SESB2V AMP against *P. aeruginosa*. A: slit lamp examination of the rabbit eyes before and after implantation and bacteria inoculation B: AS-OCT scanning of the rabbit eyes before and after implantation and bacteria inoculation C: measurement of corneal thickness. Only cornea thickness anterior to implant was measured at pre and post-inoculation D1 and D2. \*\*\* p < 0.05 between pristine Ti and Ti-AMP group at post-inoculation day 1. \*\*\*\* p < 0.05 between pristine Ti and Ti-AMP group at post-inoculation day 2. One way ANOVA

## Supplementary Figure 3

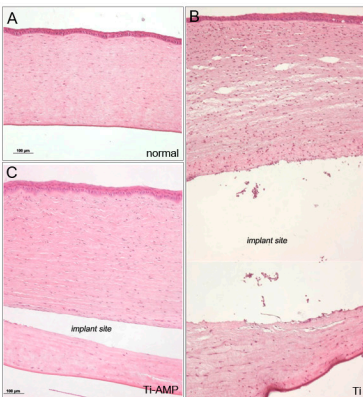

Supplementary Figure 3. Hematoxylin & Eosin (H&E) pictures of rabbit cornea after inoculation with *P. aeruginosa*. A: normal rabbit cornea B: rabbit cornea with pristine Ti implantation and bacterial infection. C: rabbit cornea with Ti-AMP implantation and bacterial infection.

## Supplementary Figure 4

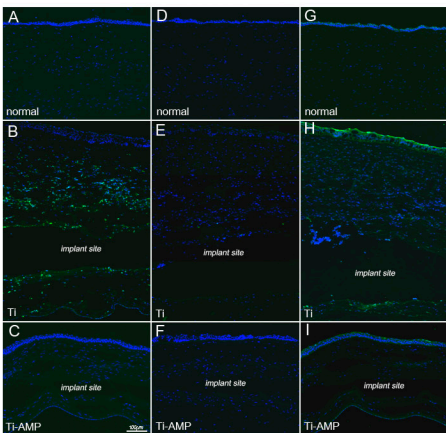

Supplementary Figure 4. Immunostaining pictures of rabbit cornea after inoculation with *P. aeruginosa*. Green, inflammatory cell markers; Blue, DAPI cell nucleus counterstaining. A-C: CD11b staining. (A) normal rabbit cornea, (B) cornea with pristine Ti implant, (C) cornea with Ti-AMP implant. D-F: F4/80 staining. (D) normal rabbit cornea, (E) cornea with pristine Ti implant, (F) cornea with Ti-AMP implant. G-I: MMP9 staining. (G) normal rabbit cornea, (H) cornea with pristine Ti implant, (I) cornea with Ti-AMP implant.
